# Supplementary material for: Assessment of Various Food Proteins as Structural Materials for Delivery of Hydrophobic Polyphenols Using a Novel Co-Precipitation Method
Source: MDPI journal article supplement (doi:10.3390/molecules28083573), 2023-04-19
Supplement: s1 [file s1]

## Supplementary Materials

# Assessment of various food proteins as structural materials for delivery of hydrophobic polyphenols using a novel co-precipitation method

Ali Rashidinejad<sup>a\*</sup>, Matthijs Nieuwkoop<sup>a©</sup>, Harjinder Singh<sup>a</sup> and Geoffrey B. Jameson<sup>a,b</sup>

<sup>a</sup>Riddet Institute, Massey University, Private Bag 11 222, Palmerston North, New Zealand.

<sup>b</sup>School of Natural Sciences, Massey University, Palmerston North 4442, New Zealand.

\*Corresponding author: A.Rashidinejad@massey.ac.nz.

©Current Address: Jan Zandbergen Group, Veenendaal, The Netherlands.

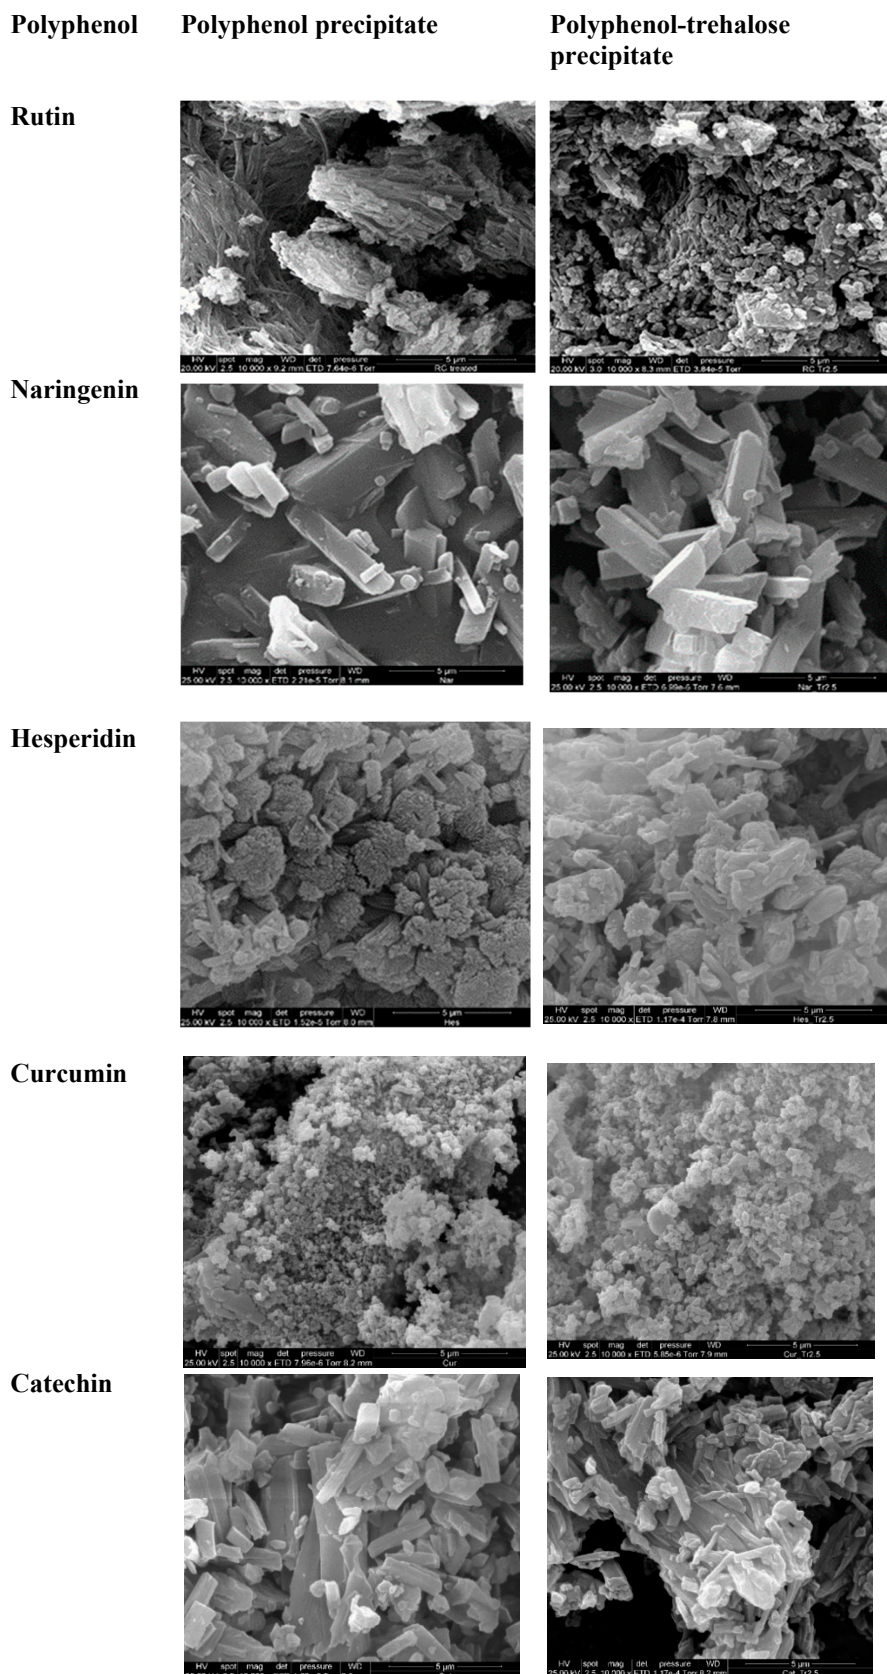

**Figure S1.** Scanning electron micrographs of the powders of treated polyphenols (precipitates) in the absence and presence of trehalose. The scale bars can be found at the bottom of each micrograph.

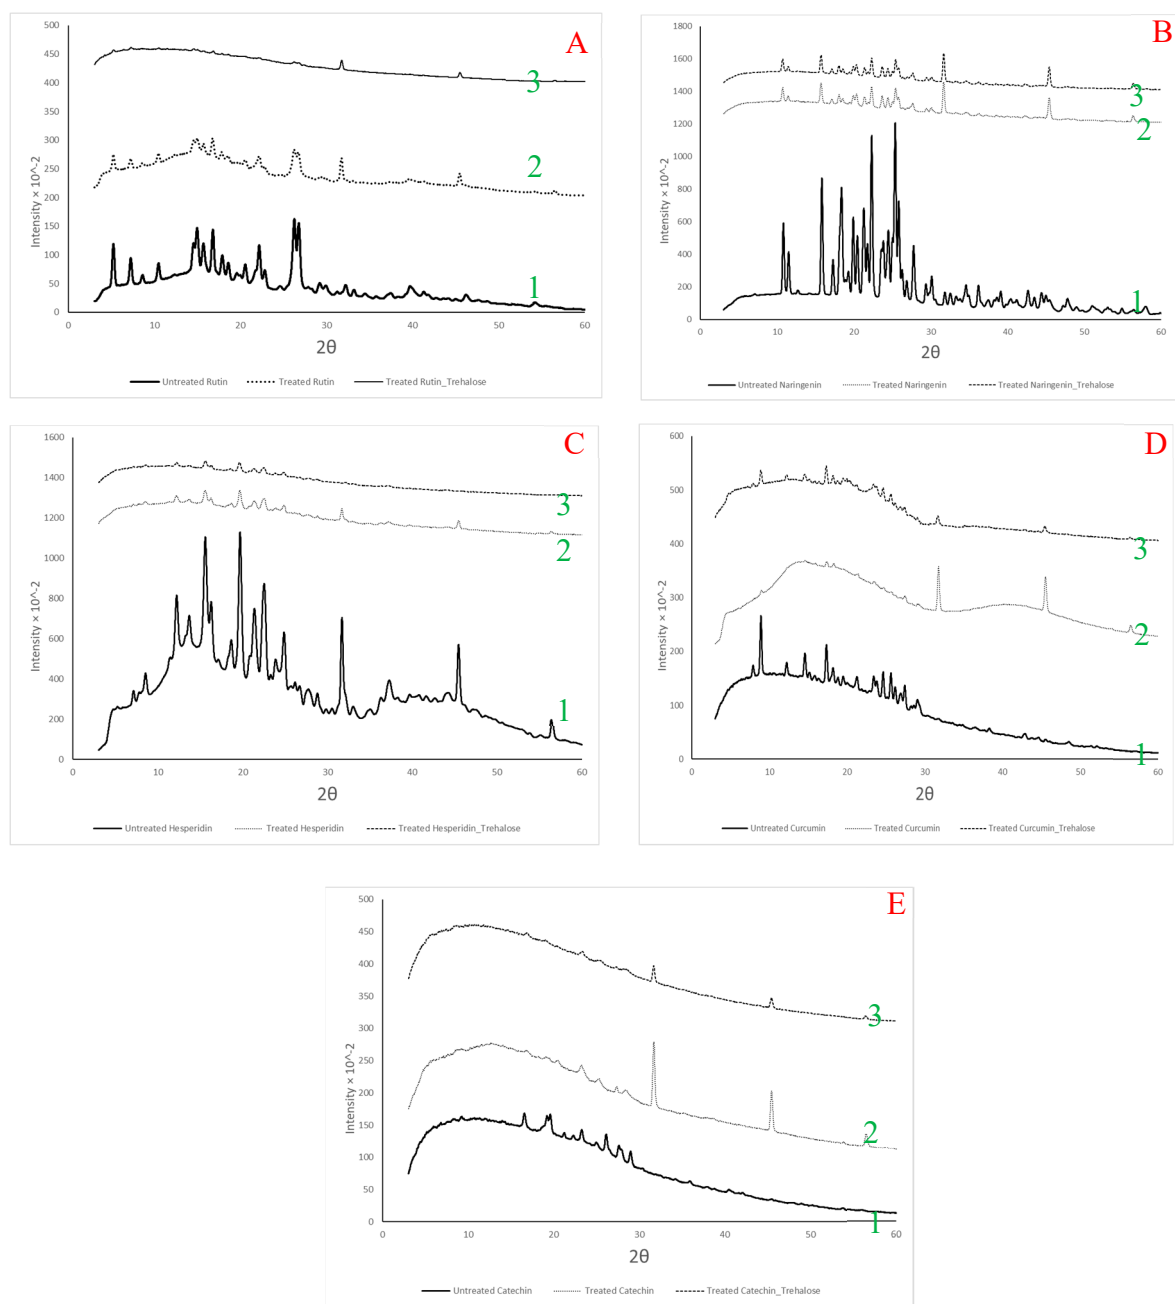

**Figure S2.** X-ray diffraction patterns of the powders of treated polyphenols (precipitates) in the absence and presence of trehalose. A; rutin, B; naringenin, C; hesperidin, D; curcumin, E: catechin. Legends from bottom to top: 1; untreated flavonoid, 2; treated in the presence of neither protein nor trehalose, 3; treated in the presence of trehalose.

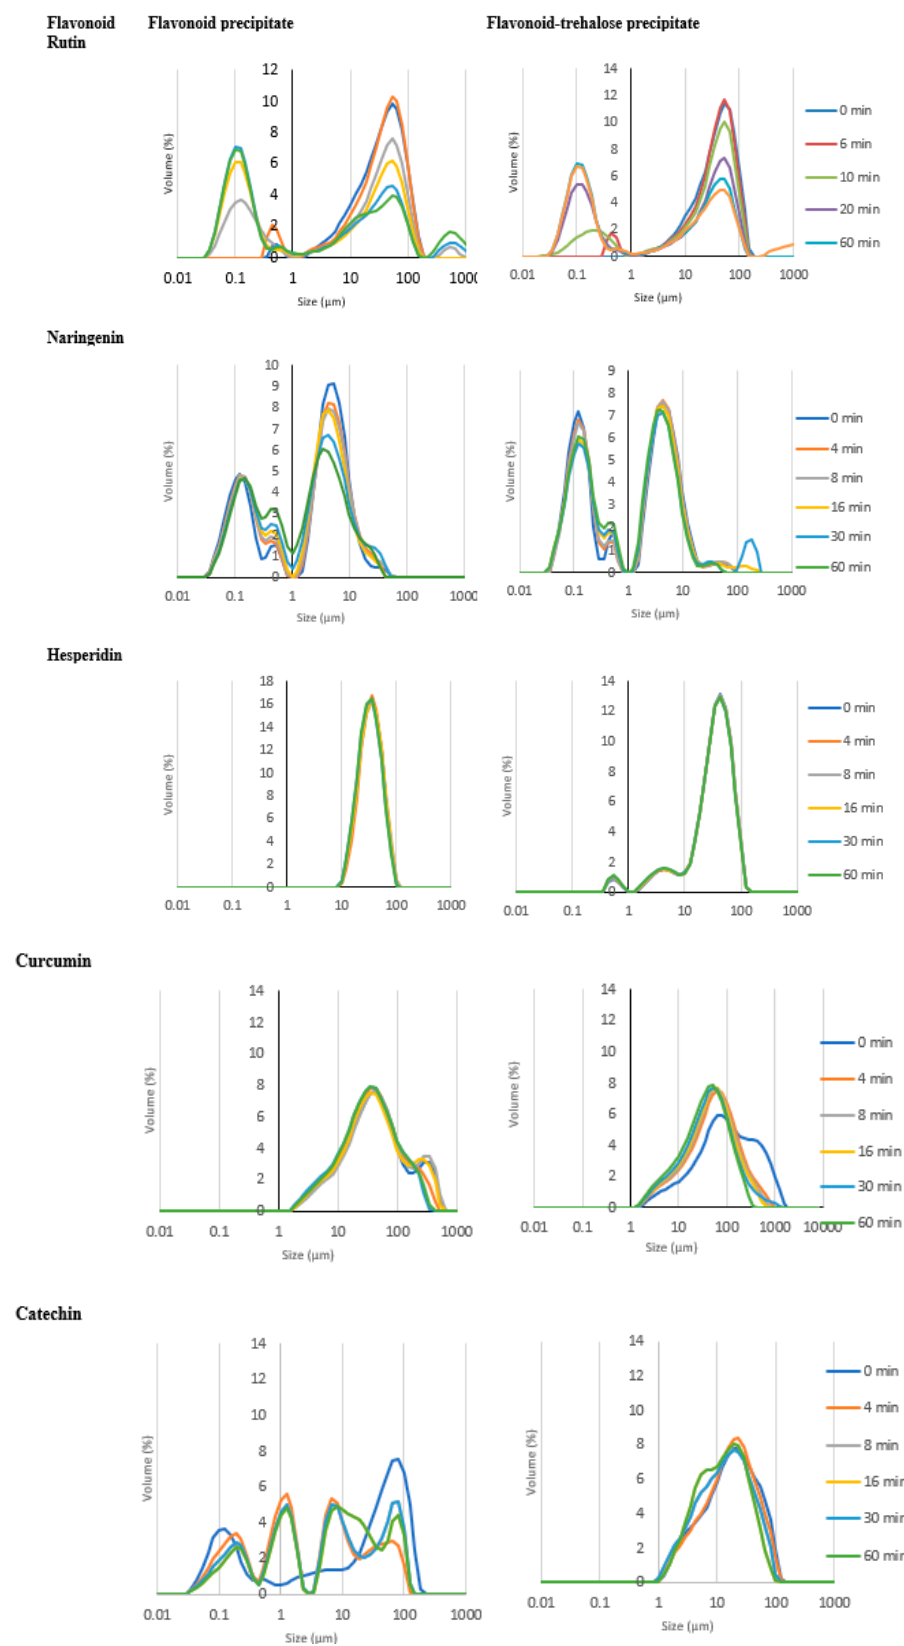

**Figure S3.** The volume % of particles over time for of the powders of treated polyphenols (precipitates) in the absence and presence of trehalose, dispersed in phosphate buffer (pH 7.0).
